# Supplementary material
Source: Elsevier journal article supplement (https://comptes-rendus.academie-sciences.fr/chimie/article/10.1016/j.crci.2014.11.001/file/attach/mmc5.pdf)

## checkCIF/PLATON report

You have not supplied any structure factors. As a result the full set of tests cannot be run.

THIS REPORT IS FOR GUIDANCE ONLY. IF USED AS PART OF A REVIEW PROCEDURE FOR PUBLICATION, IT SHOULD NOT REPLACE THE EXPERTISE OF AN EXPERIENCED CRYSTALLOGRAPHIC REFEREE.

No syntax errors found.      CIF dictionary      Interpreting this report

### Datablock: 1581

---

Bond precision:    C-C = 0.0014 A                      Wavelength=0.71073

Cell:              a=9.6854(2)              b=9.9691(2)              c=10.4536(2)  
                    alpha=87.793(2)              beta=63.452(2)              gamma=85.496(2)

Temperature:      100 K

|                | Calculated    | Reported      |
|----------------|---------------|---------------|
| Volume         | 900.13(3)     | 900.12(3)     |
| Space group    | P -1          | P -1          |
| Hall group     | -P 1          | -P 1          |
| Moiety formula | C22 H20 N2 O4 | C22 H20 N2 O4 |
| Sum formula    | C22 H20 N2 O4 | C22 H20 N2 O4 |
| Mr             | 376.40        | 376.40        |
| Dx,g cm-3      | 1.389         | 1.389         |
| Z              | 2             | 2             |
| Mu (mm-1)      | 0.097         | 0.097         |
| F000           | 396.0         | 396.0         |
| F000'          | 396.19        |               |
| h,k,lmax       | 13,14,14      | 13,14,14      |
| Nref           | 5251          | 5208          |
| Tmin,Tmax      | 0.960,0.971   | 0.890,0.960   |
| Tmin'          | 0.958         |               |

Correction method= MULTI-SCAN

Data completeness= 0.992                      Theta(max)= 30.000

R(reflections)= 0.0406( 4614)              wR2(reflections)= 0.1179( 5208)

S = 1.018                                      Npar= 257

---

The following ALERTS were generated. Each ALERT has the format  
**test-name\_ALERT\_alert-type\_alert-level.**  
Click on the hyperlinks for more details of the test.

---

● **Alert level C**

PLAT414\_ALERT\_2\_C Short Intra D-H..H-X H1N .. H5 .. 1.97 Ang.  
PLAT414\_ALERT\_2\_C Short Intra D-H..H-X H2N .. H18 .. 1.95 Ang.

● **Alert level G**

PLAT005\_ALERT\_5\_G No \_iucr\_refine\_instructions\_details in the CIF Please Do !  
PLAT007\_ALERT\_5\_G Number of Unrefined Donor-H Atoms ..... 4 Report  
PLAT154\_ALERT\_1\_G The su's on the Cell Angles are Equal ..... 0.00200 Degree  
PLAT899\_ALERT\_4\_G SHELXL97 is Deprecated and Succeeded by SHELXL 2014 Note

0 **ALERT level A** = Most likely a serious problem - resolve or explain  
0 **ALERT level B** = A potentially serious problem, consider carefully  
2 **ALERT level C** = Check. Ensure it is not caused by an omission or oversight  
4 **ALERT level G** = General information/check it is not something unexpected

1 ALERT type 1 CIF construction/syntax error, inconsistent or missing data  
2 ALERT type 2 Indicator that the structure model may be wrong or deficient  
0 ALERT type 3 Indicator that the structure quality may be low  
1 ALERT type 4 Improvement, methodology, query or suggestion  
2 ALERT type 5 Informative message, check

---

## Datablock: 1580

---

Bond precision: C-C = 0.0018 A Wavelength=0.71073

Cell: a=27.3312(9) b=12.3272(4) c=17.8035(6)  
alpha=90 beta=125.968(2) gamma=90

Temperature: 100 K

|                | Calculated    | Reported      |
|----------------|---------------|---------------|
| Volume         | 4854.7(3)     | 4854.7(3)     |
| Space group    | C 2/c         | C 2/c         |
| Hall group     | -C 2yc        | -C 2yc        |
| Moiety formula | C30 H24 N2 O4 | C30 H24 N2 O4 |
| Sum formula    | C30 H24 N2 O4 | C30 H24 N2 O4 |
| Mr             | 476.51        | 476.51        |
| Dx,g cm-3      | 1.304         | 1.304         |
| Z              | 8             | 8             |
| Mu (mm-1)      | 0.087         | 0.087         |
| F000           | 2000.0        | 2000.0        |
| F000'          | 2000.92       |               |
| h,k,lmax       | 38,17,25      | 37,17,25      |
| Nref           | 7094          | 7071          |
| Tmin,Tmax      | 0.969,0.983   | 0.850,0.970   |
| Tmin'          | 0.966         |               |

Correction method= MULTI-SCAN

Data completeness= 0.997

Theta(max)= 30.000

R(reflections)= 0.0427( 5654)

wR2(reflections)= 0.1237( 7071)

S = 1.037

Npar= 329

---

The following ALERTS were generated. Each ALERT has the format

**test-name\_ALERT\_alert-type\_alert-level.**

Click on the hyperlinks for more details of the test.

---

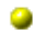

#### Alert level C

|                   |                      |     |    |     |    |           |
|-------------------|----------------------|-----|----|-----|----|-----------|
| PLAT414_ALERT_2_C | Short Intra D-H..H-X | H1N | .. | H5  | .. | 1.90 Ang. |
| PLAT414_ALERT_2_C | Short Intra D-H..H-X | H2N | .. | H18 | .. | 1.91 Ang. |

---

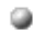

#### Alert level G

|                   |                                         |                                       |             |
|-------------------|-----------------------------------------|---------------------------------------|-------------|
| PLAT005_ALERT_5_G | No _iucr_refine_instructions_details    | in the CIF                            | Please Do ! |
| PLAT007_ALERT_5_G | Number of Unrefined Donor-H Atoms       | .....                                 | 4 Report    |
| PLAT128_ALERT_4_G | Alternate Setting for Input Space Group | C2/c                                  | I2/a Note   |
| PLAT899_ALERT_4_G | SHELXL97                                | is Deprecated and Succeeded by SHELXL | 2014 Note   |

---

- 0 **ALERT level A** = Most likely a serious problem - resolve or explain  
0 **ALERT level B** = A potentially serious problem, consider carefully  
2 **ALERT level C** = Check. Ensure it is not caused by an omission or oversight  
4 **ALERT level G** = General information/check it is not something unexpected

- 0 ALERT type 1 CIF construction/syntax error, inconsistent or missing data  
2 ALERT type 2 Indicator that the structure model may be wrong or deficient  
0 ALERT type 3 Indicator that the structure quality may be low  
2 ALERT type 4 Improvement, methodology, query or suggestion  
2 ALERT type 5 Informative message, check
- 

## Datablock: 1598

---

Bond precision: C-C = 0.0070 A

Wavelength=0.71073

Cell: a=12.0549(6) b=12.4484(6) c=12.7005(6)  
alpha=65.574(3) beta=63.112(3) gamma=85.976(3)

Temperature: 100 K

|                | Calculated                | Reported                                 |
|----------------|---------------------------|------------------------------------------|
| Volume         | 1531.60(14)               | 1531.60(13)                              |
| Space group    | P -1                      | P -1                                     |
| Hall group     | -P 1                      | -P 1                                     |
| Moiety formula | C56 H52 Co4 N10 O10, 2(O) | C56 H52 Co4 N10 O10, 2(H2 O), 2(C2 H3 N) |
| Sum formula    | C56 H52 Co4 N10 O12       | C60 H62 Co4 N12 O12                      |
| Mr             | 1292.80                   | 1378.94                                  |
| Dx,g cm-3      | 1.402                     | 1.495                                    |
| Z              | 1                         | 1                                        |
| Mu (mm-1)      | 1.130                     | 1.136                                    |
| F000           | 662.0                     | 710.0                                    |
| F000'          | 663.63                    |                                          |
| h,k,lmax       | 14,14,15                  | 13,14,15                                 |
| Nref           | 5399                      | 5127                                     |
| Tmin,Tmax      | 0.761,0.834               | 0.660,0.840                              |
| Tmin'          | 0.680                     |                                          |

Correction method= MULTI-SCAN

Data completeness= 0.950                      Theta(max)= 25.000

R(reflections)= 0.0542( 3398)              wR2(reflections)= 0.1575( 5127)

S = 1.090                                      Npar= 375

The following ALERTS were generated. Each ALERT has the format

**test-name\_ALERT\_alert-type\_alert-level.**

Click on the hyperlinks for more details of the test.

### Alert level B

CHEMW03\_ALERT\_2\_B WARNING: The ratio of given/expected molecular weight as calculated from the `_atom_site*` data lies outside the range 0.95 <> 1.05

From the CIF: `_cell_formula_units_Z` 1

From the CIF: `_chemical_formula_weight` 1378.94

TEST: Calculate formula weight from `_atom_site_*`

| atom | mass  | num   | sum    |
|------|-------|-------|--------|
| C    | 12.01 | 56.00 | 672.62 |
| H    | 1.01  | 52.00 | 52.42  |
| N    | 14.01 | 10.00 | 140.07 |
| O    | 16.00 | 12.00 | 191.99 |
| Co   | 58.93 | 4.00  | 235.73 |

Calculated formula weight                      1292.82

**Author Response:** The compound was crystallized during electrosynthesis of the tetranuclear Co(ii)/Co(iii) complex in an acetonitrile solution in the presence of moisture. The solid state compound is a solvate of H<sub>2</sub>O and CH<sub>3</sub>CN. The acetonitrile solvent molecule was found near the centre of inversion at x,y,z=0,1/2,0 and was disordered. This acetonitrile was squeezed with program PLATON prior to final refinement. The molecule is situated in a single centrosymmetric cavity with a solvent accessible volume of ca. 200 Å<sup>3</sup> and contains apparently two acetonitrile molecules per cavity and per one tetranuclear Co(ii)/Co(iii) complex. The theoretical electron count of these two molecules is 44, whereas PLATON calculated an electron count of 48 e from the diffraction data. Chemical formula and derived quantities are given for (C<sub>60</sub>H<sub>62</sub>Co<sub>4</sub>N<sub>10</sub>O<sub>10</sub>), 2(H<sub>2</sub>O), 2(C<sub>2</sub>H<sub>3</sub>N), which is also the unit cell content. The difference between atom count of the crystal structure model and the given chemical composition leads to various other checkCIF/PLATON alerts which are not separately outlined. These alerts are CHEMW03, PLAT041, PLAT042, PLAT068, FORMU01, CELLZ01. The region where the acetonitrile solvent molecules are located can be easily recognized in a packing diagram viewed along [100].

```
PLAT029_ALERT_3_B _diffrn_measured_fraction_theta_full Low ..... 0.950 Note
PLAT306_ALERT_2_B Isolated Oxygen Atom (H-atoms Missing ?) ..... O6W Check
```

**Author Response:** O6w is the oxygen of a water molecule the hydrogen atoms of which could not be located. It resides in a pocket of the Co complex between the acetonitrile ligands N4-C25-C26H3 and N5-C27-C28H3 and the phenyl ring C15 - C20. The distances from O6w to C25, C27, and the ring centroid C15 through C20 are 3.18, 3.17 and 3.33 Å, respectively. The contact O6w...O2 = 2.68 Å to the keto oxygen atom O2 represents probably a O-H...O hydrogen bond.

```
PLAT420_ALERT_2_B D-H Without Acceptor O5H - H50 ... Please Check
```

**Author Response:** This is an OH group with a pyramidal coordination by three Co atoms and located in a cavity of a tetranuclear Co complex. This OH group may have hydrogen bond interactions to a disordered acetonitrile solvent molecule that was squeezed with program PLATON. See comments on other alerts for further information.

```
PLAT430_ALERT_2_B Short Inter D...A Contact O2 .. O6W .. 2.68 Ang.
```

**Author Response:** O6w is the oxygen of a water molecule the hydrogen atoms of which could not be located. It resides in a pocket of the Co complex between the acetonitrile ligands N4-C25-C26H3 and N5-C27-C28H3 and the phenyl ring C15 - C20. The distances from O6w to C25, C27, and the ring centroid C15 through C20 are 3.18, 3.17 and 3.33 Å, respectively. The contact O6w...O2 = 2.68 Å to the keto oxygen atom O2 represents probably a O-H...O hydrogen bond.

---

● **Alert level C**

PLAT041\_ALERT\_1\_C Calc. and Reported SumFormula Strings Differ Please Check  
PLAT068\_ALERT\_1\_C Reported F000 Differs from Calcd (or Missing)... Please Check  
PLAT341\_ALERT\_3\_C Low Bond Precision on C-C Bonds ..... 0.0070 Ang.

---

● **Alert level G**

FORMU01\_ALERT\_2\_G There is a discrepancy between the atom counts in the  
\_chemical\_formula\_sum and the formula from the \_atom\_site\* data.  
Atom count from \_chemical\_formula\_sum: C60 H62 Co4 N12 O12  
Atom count from the \_atom\_site data: C56 H52 Co4 N10 O12  
CELLZ01\_ALERT\_1\_G Difference between formula and atom\_site contents detected.  
CELLZ01\_ALERT\_1\_G ALERT: Large difference may be due to a  
symmetry error - see SYMMG tests  
From the CIF: \_cell\_formula\_units\_Z 1  
From the CIF: \_chemical\_formula\_sum C60 H62 Co4 N12 O12  
TEST: Compare cell contents of formula and atom\_site data

| atom | Z*formula | cif sites | diff  |
|------|-----------|-----------|-------|
| C    | 60.00     | 56.00     | 4.00  |
| H    | 62.00     | 52.00     | 10.00 |
| Co   | 4.00      | 4.00      | 0.00  |
| N    | 12.00     | 10.00     | 2.00  |
| O    | 12.00     | 12.00     | 0.00  |

PLAT002\_ALERT\_2\_G Number of Distance or Angle Restraints on AtSite 40 Note  
PLAT003\_ALERT\_2\_G Number of Uiso or Uij Restrained non-H Atoms ... 40 Report  
PLAT005\_ALERT\_5\_G No \_iucr\_refine\_instructions\_details in the CIF Please Do !  
PLAT007\_ALERT\_5\_G Number of Unrefined Donor-H Atoms ..... 1 Report  
PLAT042\_ALERT\_1\_G Calc. and Reported MoietyFormula Strings Differ Please Check  
PLAT154\_ALERT\_1\_G The su's on the Cell Angles are Equal ..... 0.00300 Degree  
PLAT605\_ALERT\_4\_G Structure Contains Solvent Accessible VOIDS of . 201 A\*\*3

**Author Response: Acetonitrile solvent squeezed. See CHEMW03 and PLAT869 for further information**

PLAT860\_ALERT\_3\_G Number of Least-Squares Restraints ..... 150 Note

**Author Response: Soft bond distance restraints (sigma 0.003 - 0.005 A) were used to emphasize the 2/m pseudosymmetry of the tetranuclear Co complex (but not of the crystal structure, which is cleanly triclinic P-1). Moreover a DELU 0.005 0.005 restraint was applied to the Uij.**

PLAT869\_ALERT\_4\_G ALERTS Related to the use of SQUEEZE Suppressed ! Info

**Author Response:** The compound was crystallized during electrosynthesis of the tetranuclear Co(ii)/Co(iii) complex in an acetonitrile solution in the presence of moisture. The solid state compound is a solvate of H<sub>2</sub>O and CH<sub>3</sub>CN. The acetonitrile solvent molecule was found near the centre of inversion at x,y,z=0,1/2,0 and was disordered. This acetonitrile was squeezed with program PLATON prior to final refinement. The molecule is situated in a single centrosymmetric cavity with a solvent accessible volume of ca. 200 Å<sup>3</sup> and contains apparently two acetonitrile molecules per cavity and per one tetranuclear Co(ii)/Co(iii) complex. The theoretical electron count of these two molecules is 44, whereas PLATON calculated an electron count of 48 e from the diffraction data. Chemical formula and derived quantities are given for (C<sub>60</sub>H<sub>62</sub>Co<sub>4</sub>N<sub>10</sub>O<sub>10</sub>), 2(H<sub>2</sub>O), 2(C<sub>2</sub>H<sub>3</sub>N), which is also the unit cell content. The difference between atom count of the crystal structure model and the given chemical composition leads to various other checkCIF/PLATON alerts which are not separately outlined. These alerts are CHEMW03, PLAT041, PLAT042, PLAT068, FORMU01, CELLZ01. The region where the acetonitrile solvent molecules are located can be easily recognized in a packing diagram viewed along [100].

PLAT899\_ALERT\_4\_G SHELXL97 is Deprecated and Succeeded by SHELXL 2014 Note

---

0 **ALERT level A** = Most likely a serious problem - resolve or explain  
5 **ALERT level B** = A potentially serious problem, consider carefully  
3 **ALERT level C** = Check. Ensure it is not caused by an omission or oversight  
13 **ALERT level G** = General information/check it is not something unexpected

6 ALERT type 1 CIF construction/syntax error, inconsistent or missing data  
7 ALERT type 2 Indicator that the structure model may be wrong or deficient  
3 ALERT type 3 Indicator that the structure quality may be low  
3 ALERT type 4 Improvement, methodology, query or suggestion  
2 ALERT type 5 Informative message, check

---

---

It is advisable to attempt to resolve as many as possible of the alerts in all categories. Often the minor alerts point to easily fixed oversights, errors and omissions in your CIF or refinement strategy, so attention to these fine details can be worthwhile. In order to resolve some of the more serious problems it may be necessary to carry out additional measurements or structure refinements. However, the purpose of your study may justify the reported deviations and the more serious of these should normally be commented upon in the discussion or experimental section of a paper or in the "special\_details" fields of the CIF. checkCIF was carefully designed to identify outliers and unusual parameters, but every test has its limitations and alerts that are not important in a particular case may appear. Conversely, the absence of alerts does not guarantee there are no aspects of the results needing attention. It is up to the individual to critically assess their own results and, if necessary, seek expert advice.

### **Publication of your CIF in IUCr journals**

A basic structural check has been run on your CIF. These basic checks will be run on all CIFs submitted for publication in IUCr journals (*Acta Crystallographica*, *Journal of Applied Crystallography*, *Journal of Synchrotron Radiation*); however, if you intend to submit to *Acta Crystallographica Section C* or *E*, you should make sure that full publication checks are run on the final version of your CIF prior to submission.

### **Publication of your CIF in other journals**

Please refer to the *Notes for Authors* of the relevant journal for any special instructions relating to CIF submission.

---

**PLATON version of 20/08/2014; check.def file version of 18/08/2014**



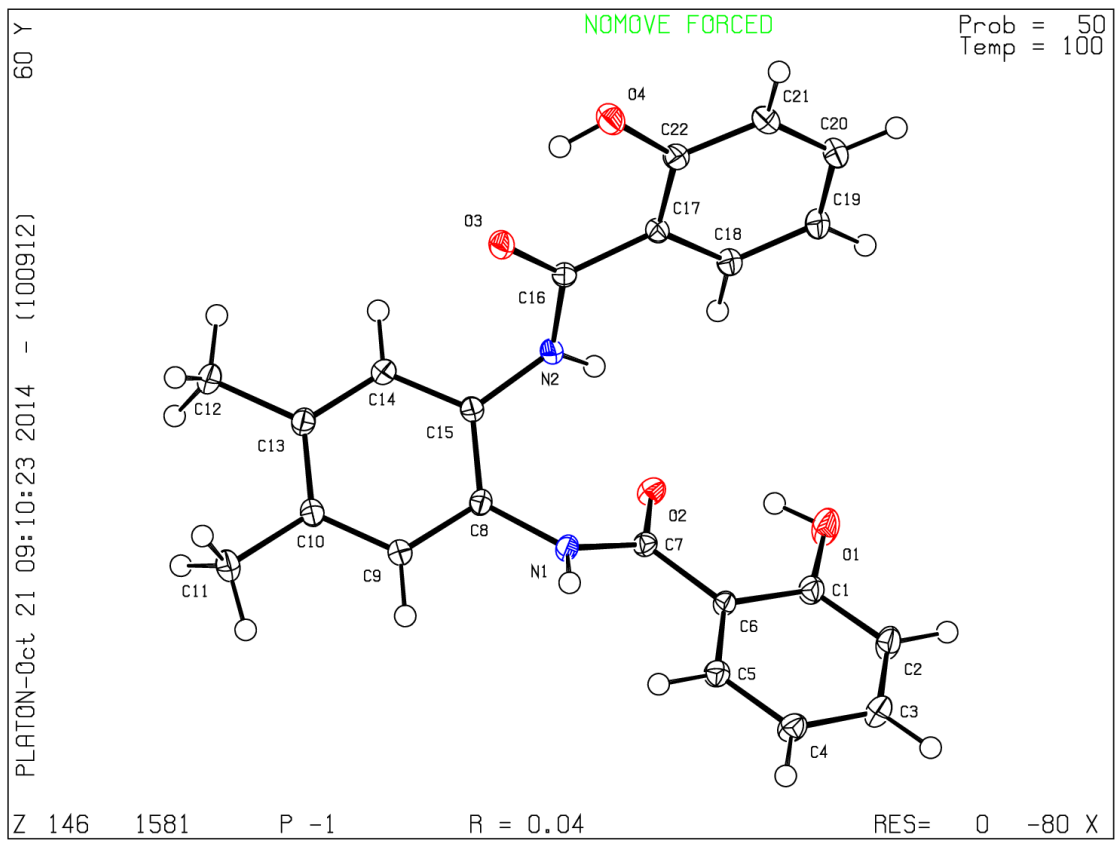

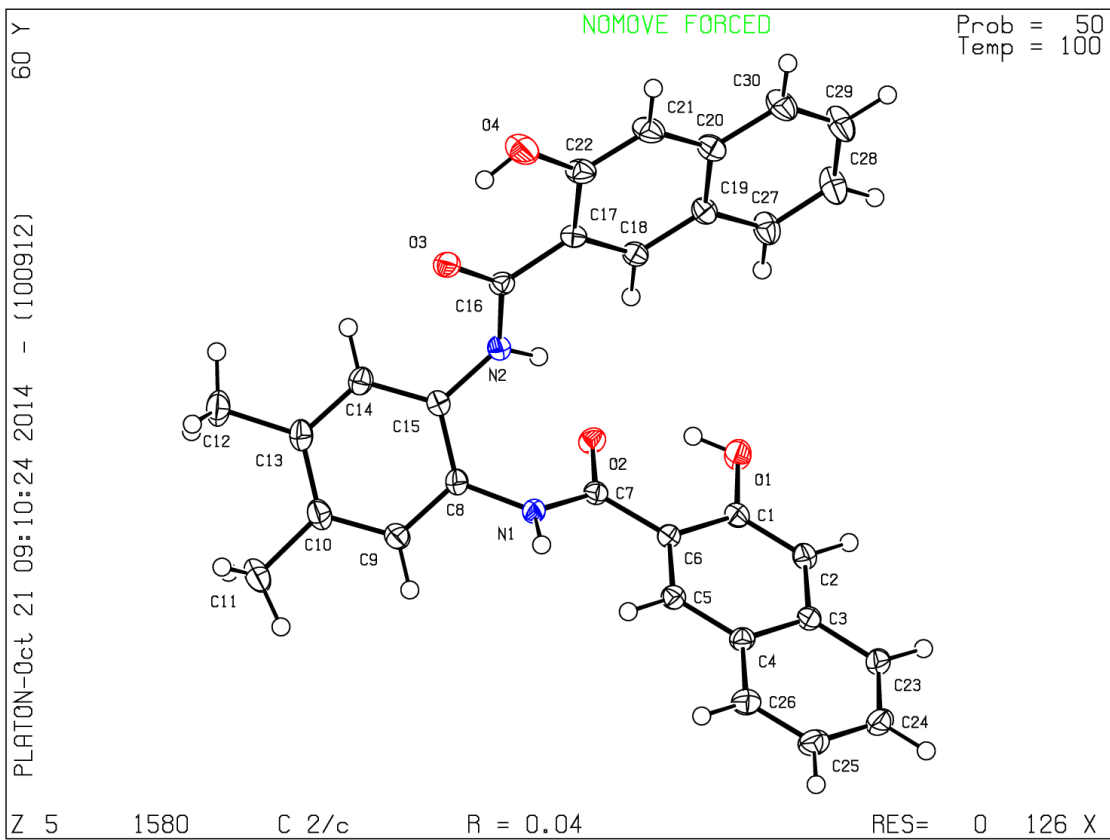

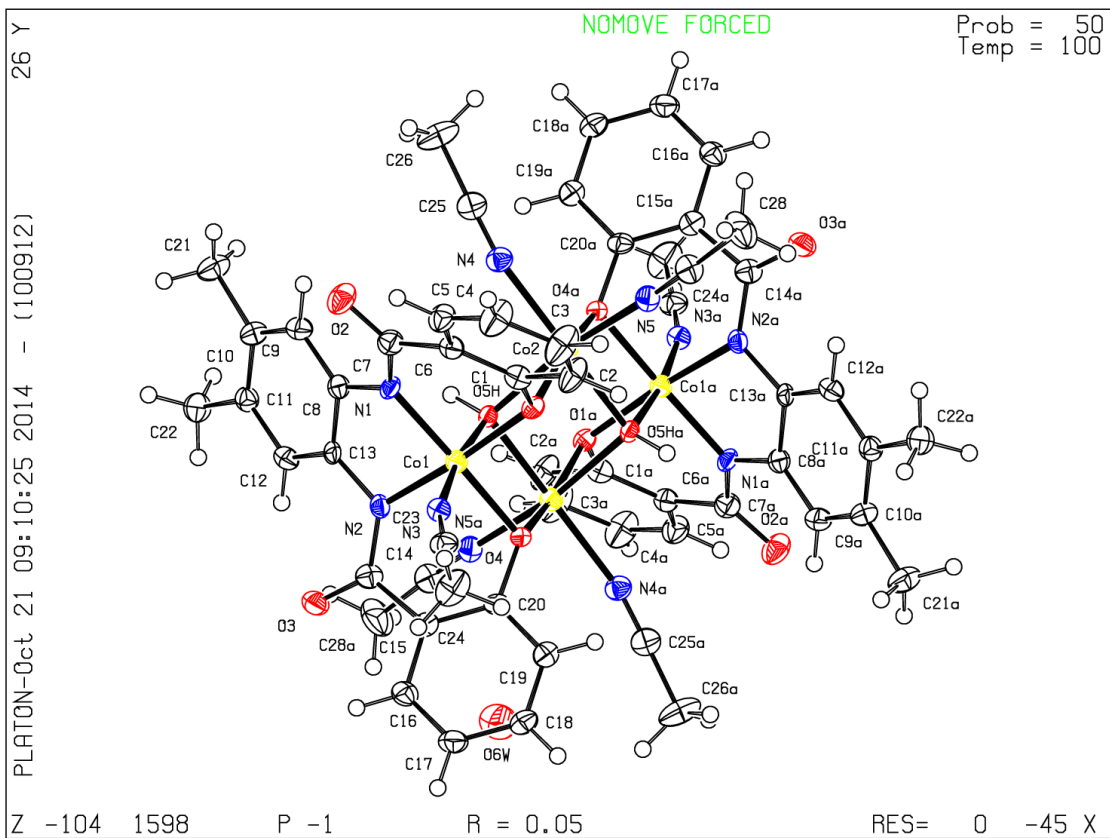

Supplement: mmc5 [file mmc5.pdf]
